# Supplementary material for: A Systematic Review and Meta-Analysis of Depression among Farming Populations Worldwide
Source: PubMed Central journal article supplement (PMC7765209; doi:10.3390/ijerph17249376), 2020-12-15
Supplement: ijerph-17-09376-s001.pdf [file ijerph-17-09376-s001.pdf]

RefID: 1, There and Back Again: A Review of Residency and Return Migrations in Sharks, with Implications for Population Structure and Management. Chapman DD, Feldheim KA, Papastamatiou Y, Hueter RE

The overexploitation of sharks has become a global environmental issue in need of a comprehensive and multifaceted management response. Tracking studies are beginning to elucidate how shark movements shape the internal dynamics and structure of populations, which determine the most appropriate scale of these management efforts.

Tracked sharks frequently either remain in a restricted geographic area for an extended period of time (residency) or return to a previously resided-in area after making long-distance movements (site fidelity). Genetic studies have shown that some individuals of certain species preferentially return to their exact birthplaces (natal philopatry) or birth regions (regional philopatry) for either parturition or mating, even though they make long-distance movements that would allow them to breed elsewhere. More than 80 peer-reviewed articles, constituting the majority of published shark tracking and population genetic studies, provide evidence of at least one of these behaviors in a combined 31 shark species from six of the eight extant orders.

Residency, site fidelity, and philopatry can alone or in combination structure many coastal shark populations on finer geographic scales than expected based on their potential for dispersal. This information should therefore be used to scale and inform assessment, management, and conservation activities intended to restore depleted shark populations. Expected final online publication date for the Annual Review of Marine Science Volume 7 is January 03, 2015.

1. Was the target population explicitly stated or did you have to assume what it was?

Stated target population

had to assume target population

2. Which of the following is true regarding the sample of the study

- entire target population
- randomly selected sample
- convenience sample
- sample stated as representative of target population
- not reported

3. Which of the following applies with regards to responders and nonresponders

- reasons for non responders described
- described non responders
- compared responders and non responders
- compared sample and target population
- not reported

4. What was the response rate?

≥ 90%

70-90%

≤ 70%

not reported

5. Was data primary from a prevalence study or pulled from a survey designed for another purpose?

prevalence study

another design

not reported

6. Was the same mode of data collection used for all participants?

Yes

No

7. Were the data collected directly using a validated scale?

 Yes No validated scale was used data collected from proxies or retrospectively from medical records not reported

8. Was there a description of the study population and setting that the participants were sampled from?

 Yes No

9. Was there a description of the gender and age of participants?

 Yes No

10. Did they report the final sample size or the number of participants that were analyzed?

 Yes No

11. report number of participants classified as having depression as a number rather than a percentage of their sample.

 Yes No

# Full text not available

RefID: 142, Mental health self-care strategies of Mexican seasonal farm workers in Canada: an Ethnographic Study

A. Escrig

Level: 2, State: Excluded

RefID: 741, The impact of a natural disaster on physical and mental health: Offspring morbidity and crop loss as mediators of paternal testosterone, cortisol, and depression among Bolivian forager-farmers

B. C. Trumble, J. Stieglitz, A. Jaeggi, B. Beheim, M. Schwartz, H. Kaplan, M. Gurven

Level: 2, State: Excluded

RefID: 825, Informal Caregivers' Subjective Well-Being After a Training and Recreation Week: Multilevel Models for Longitudinal Data

C. Hetzel, M. Opfermann-Kersten, M. Holzer

Level: 2, State: Excluded

RefID: 911, Maharashtra government launches mental health programme to reduce suicide in farmers

C. Travasso

Level: 2, State: Excluded

RefID: 1402, Metabolic syndrome and mental health: A study of Australian farm men and women

N. Jeffery-Dawes, D. Mellor, S. Brumby

Level: 2, State: Excluded

RefID: 1412, A Predictive Model of Depression in Rural Elders-Decision Tree Analysis

S. E. Kim, S. A. Kim

Level: 2, State: Excluded

RefID: 1572, The Farming Family Work Environment: Consideration of a Hypothesised Model of Role Interference

C. McShane, F. Quirk, A. Swinbourne

Level: 2, State: Excluded

RefID: 2268, Mental health first aid training for Advisory and Extension Agents working with farmers

D. Gorman, D. Hossain, R. Eley, J. Coutts

Level: 2, State: Excluded

RefID: 2313, Mental health and work in a national survey of farm managers in the United States

T. Alterman, J. Li, A. Steege, M. Petersen, C. Muntaner

Level: 2, State: Excluded

RefID: 2325, Depressive symptoms and contraceptive use among Latinas in an agricultural community

T. L. Barcellos, M. T. Stoecklin-Marois, T. E. Hennessy-Burt, M. B. Schenker

Level: 2, State: Excluded

RefID: 2665, Affective disorders among the rural population

V. N. S. de Snyder, M. D. Diaz-Perez

Level: 2, State: Excluded

RefID: 2959, Farm stress: A community development approach to mental health service delivery

N. Gerrard

Level: 2, State: Excluded

RefID: 2962, Mental health risk among rural adolescents

F. Bujak

Level: 2, State: Excluded

RefID: 3110, Farm Family Mental-Health Issues

J. L. Ellis, P. R. Gordon

Level: 2, State: Excluded

RefID: 3159, Mental-Health and Unemployment - Psychopathologic Approximation to Agricultural Lock-Outs - Spanish - Sevadiaz,A

L. Meyer

Level: 2, State: Excluded

RefID: 3188, Agriculture, Anxiety of the Whole World

R. Veylon

Level: 2, State: Excluded

RefID: 3282, A comparison of barriers to mental health support-seeking among farming and non-farming adults in rural South Australia

Melissa J. Hull, James Dollman, Kari Vallury, Kate M. Fennell, Martin Jones

Level: 2, State: Excluded

RefID: 3878, Sowing the seeds of hope : responding to the mental health needs of farm families : rural services directory

Level: 2, State: Excluded

RefID: 3890, Responding to farm stress produced by Tommy Haggas & Ryan Powell ; a Loras College Production

Level: 2, State: Excluded

RefID: 3908, Optimism and well-being--in rural communities  
C. Day  
Level: 2, State: Excluded

RefID: 3915, Psychological distress and size of place: the epidemiology of rural economic stress  
D. R. Hoyt, D. O'Donnell, K. Y. Mack  
Level: 2, State: Excluded

RefID: 3935, Inpatient mental health services in rural areas: an interregional comparison  
M. O. Wagenfeld, H. F. Goldsmith, D. Stiles, R. W. Manderscheid  
Level: 2, State: Excluded

RefID: 3954, Consumption patterns, hardship, and stress among farm households  
L. M. Lobao, K. Meyer  
Level: 2, State: Excluded

RefID: 3967, Delivery of mental health services is a special problem in rural areas  
R. L. Pitzer  
Level: 2, State: Excluded

RefID: 3976, The well-being of migrant farm workers in New York State  
P. S. K. Chi  
Level: 2, State: Excluded

RefID: 3980, Farm families and stress: one year later  
J. Obst  
Level: 2, State: Excluded

RefID: 3984, Farmers in distress: how veterinarians can help out  
R. T. Williams  
Level: 2, State: Excluded

RefID: 4030, Mental health response to the farm foreclosure crisis  
D. S. Hargrove  
Level: 2, State: Excluded

RefID: 4033, Stress on the farm. 3. Understanding depression--yours and theirs  
R. Weigel, S. Mays, B. Abbott  
Level: 2, State: Excluded

RefID: 4066, The contribution of agricultural communities to mental health  
H. L. Waring  
Level: 2, State: Excluded

RefID: 4081, Depression in rural America  
Linda Siderius, Sherry Leach

Level: 2, State: Excluded

RefID: 4110, Mental health in rural and urban environments

S. D. Webb

Level: 2, State: Excluded

RefID: 4118, Depressed area chooses 'COP' over 'cop out'

A. S. Holmes, B. Sorter

Level: 2, State: Excluded

RefID: 4159, Depression : cause, effect, remedy : Chapter III. Agriculture

Meno Kammerhoff

Level: 2, State: Excluded

RefID: 4162, What is the chief cause of the farm depression? : publication extracts which present diversified viewpoints on the question

Level: 2, State: Excluded

RefID: 4164, What is the chief cause of the farm depression?

Level: 2, State: Excluded

RefID: 4189, The incidence of farming prosperity and depression; a survey of conditions in England to-day, [by] D. Skilbeck and M. Messer

D. Skilbeck, M. Messer

Level: 2, State: Excluded

RefID: 6556, Major depression in a nonclinical sample. Demographic and clinical risk factors for first onset

W. Coryell, J. Endicott, M. Keller

Level: 2, State: Excluded

RefID: 6946, [Not Available]

A. Soldi, M. Alberti Claudi

Level: 2, State: Excluded

RefID: 6947, [Not Available]

V. Lund, C. Faurholt

Level: 2, State: Excluded

RefID: 6948, [Not Available]

A. Albarracin Teulon

Level: 2, State: Excluded

RefID: 7854, Understanding depression: yours and your family's

B. H. Frazier  
Level: 2, State: Excluded

RefID: 7871, Let go of your depression  
R. J. Fetsch  
Level: 2, State: Excluded

RefID: 7941, The major causes of the depression. By Gardiner C. Means  
Level: 2, State: Excluded

## **Not available in English**

RefID: 402, Some aspects of circular depressive disorders pathomorphosis at present  
N. G. Pshuk, I. S. Pototska, O. O. Belov  
Level: 2, State: Excluded

RefID: 517, Lifestyle, Mental Health and Gender Conditions in Rural Contexts: A Study within Agraria Reform Settlements of Northeastern Brazil  
J. F. Leite, M. Dimenstein, C. B. Dantas, E. L. Silva, J. P. S. Macedo, A. P. de Sousa  
Level: 2, State: Excluded

RefID: 603, Evaluation of psycho-organisational constraints according to Karasek's Model among workers of 14 private sector companies in Tunisia  
I. Magroun, H. Ghannouchi, S. Fehri, M. Chatti, F. Ben Salah, H. Nouaigui  
Level: 2, State: Excluded

RefID: 1102, Construct and validation of a quality of life's scale for older French people  
S. Petit, V. Bergua, K. Peres, J. Bouisson, M. Koleck  
Level: 2, State: Excluded

RefID: 1323, The investigation of risk factors which predict postpartum depression in seasonal farm workers  
M. Nebioglu, S. Akbaba, F. Kabalcioglu, Y. Eroglu, M. Gultekin  
Level: 2, State: Excluded

RefID: 1842, Changes in perceived health in war-displaced population, Ayacucho, Peru: 1980-2004  
J. M. Medina, S. Lopez-Moreno  
Level: 2, State: Excluded

RefID: 1843, People's experiences in a natural environment in the Vredefort Dome, South Africa: Implications for spatial development  
V. Roos, H. Coetzee, K. Puren  
Level: 2, State: Excluded

RefID: 1991, IRREGULAR MIGRATION AND SOCIAL ISOLATION Tamaulipas'  
Undocumented Farm Workers in the United States

S. P. I. Palacios

Level: 2, State: Excluded

RefID: 2084, Mental health and wellbeing in Icelandic farmers

K. Tomasson, G. Guomundsson

Level: 2, State: Excluded

RefID: 2185, Trend and factors influencing suicides in rural areas of Kermanshah (in Iran)  
during 7 years (2000-2006)

P. Safaie, K. Jahangiri, N. Barkhordar, N. Barkhordar

Level: 2, State: Excluded

RefID: 2363, Working and health conditions and preventive measures in a random sample of  
5000 workers in the Veneto Region examined by telephone interview

G. Mastrangelo, S. Perticaroli, G. Campo, G. Priolo, A. Leva, D. de Merich, G. Marangi, U.

Fedeli, E. Fadda, L. Scoizzato, L. Marchiori

Level: 2, State: Excluded

RefID: 2680, A cross-sectional study about mental health of farm-workers

N. M. X. Faria, L. A. Facchini, A. G. Fassa, E. Tomasi

Level: 2, State: Excluded

RefID: 6195, [A cross-sectional study about mental health of farm-workers from Serra Gaucha  
(Brazil)]

N. M. Faria, L. A. Facchini, A. G. Fassa, E. Tomasi

Level: 2, State: Excluded

## **Not a primary study**

RefID: 65, Suicide An Unrecognized Epidemic Among Farmers

M. S. Jones, D. B. Reed, M. L. Hunt

Level: 2, State: Excluded

RefID: 71, Inequity amplified: climate change, the Australian farmer, and mental health

M. Shorthouse, L. Stone

Level: 2, State: Excluded

RefID: 121, Agriculture, Anxiety, and Amazonification: Creative Adaptation and Resistance in  
Risky Rural and Urban Landscapes

B. Janssen, M. Styles

Level: 2, State: Excluded



RefID: 133, Longitudinal study of health, disease and access to care in rural Victoria: the Crossroads-II study: methods  
K. M. Glenister, L. Bourke, L. Bolitho, S. Wright, S. Roberts, W. Kemp, L. Rhode, R. Bhat, S. Tremper, D. J. Magliano, M. Morgan, R. Marino, W. Adam, D. Simmons  
Level: 2, State: Excluded

RefID: 160, 'Farming on the Edge': Wellbeing and Participation in Agri-Environmental Schemes  
H. Saxby, M. Gkartzios, K. Scott  
Level: 2, State: Excluded

RefID: 227, Mothers, wives, and farmers: Stories of women 'gone mad'  
K. J. Millondaga  
Level: 2, State: Excluded

RefID: 247, Migrant Workers and Their Occupational Health and Safety  
S. C. Moyce, M. Schenker  
Level: 2, State: Excluded

RefID: 257, The Care Economy in Post-Reform China: Feminist Research on Unpaid and Paid Work and Well-Being  
R. Connelly, X. Y. Dong, J. Jacobsen, Y. H. Zhao  
Level: 2, State: Excluded

RefID: 340, Pesticides: A Case Domain for Environmental Neuroethics  
L. Y. Cabrera  
Level: 2, State: Excluded

RefID: 374, Farmers' suicide and agrarian crisis: Social policy and public mental health  
A. Das  
Level: 2, State: Excluded

RefID: 535, Prevention of farmer suicides: Greater need for state role than for a mental health professional's role  
T. S. S. Rao, M. R. Gowda, K. Ramachandran, C. Andrade  
Level: 2, State: Excluded

RefID: 543, A Gendered Model of the Peasant Household: Time Poverty and Farm Production in Rural Mozambique  
D. Arora, C. Rada  
Level: 2, State: Excluded

RefID: 546, Comparison of the Center for Epidemiology Studies Depression Scale and Beck Depression Inventory for Research with Latinas  
M. Bogardus  
Level: 2, State: Excluded

RefID: 562, Participation in Social Activities and the Association with Socio-Demographic and Health-Related Factors among Community-Dwelling Older Adults in Jamaica  
D. Willie-Tyndale, D. Holder-Nevins, K. Mitchell-Fearon, K. James, H. Laws, N. K. Waldron, D. Eldemire-Shearer  
Level: 2, State: Excluded

RefID: 697, Social, Occupational, and Spatial Exposures and Mental Health Disparities of Working-Class Latinas in the US  
Y. C. Hsieh, Y. Apostolopoulos, K. Hatzudis, S. Sonmez  
Level: 2, State: Excluded

RefID: 894, "A Different Kettle of Fish": Mental health strategies for Australian fishers, and farmers  
T. King, S. Kilpatrick, K. Willis, C. Speldewinde  
Level: 2, State: Excluded

RefID: 974, Suicide in India  
S. Aggarwal  
Level: 2, State: Excluded

RefID: 1240, Are the Predictors of Work Absence Following a Work-Related Injury Similar for Musculoskeletal and Mental Health Claims?  
P. M. Smith, O. Black, T. Keegel, A. Collie  
Level: 2, State: Excluded

RefID: 1441, Should Mental Health Interventions Be Locally Grown or Factory-Farmed?  
G. E. Simon, E. J. Ludman  
Level: 2, State: Excluded

RefID: 1759, Improving the mental health of rural New South Wales communities facing drought and other adversities  
C. R. Hart, H. L. Berry, A. M. Tonna  
Level: 2, State: Excluded

RefID: 1801, Does intergenerational mobility shape psychological distress? Sorokin revisited  
J. N. Houle, M. A. Martin  
Level: 2, State: Excluded

RefID: 1847, Climate Change and Farmers' Mental Health: Risks and Responses  
H. L. Berry, A. Hogan, J. Owen, D. Rickwood, L. Fragar  
Level: 2, State: Excluded

RefID: 1898, Farmers' Suicide in India: Implications for Public Mental Health  
A. Das  
Level: 2, State: Excluded

RefID: 2136, Country Living, Country Dying: Rural Suicides in New Zealand, 1900-1950  
J. C. Weaver, D. Munro  
Level: 2, State: Excluded

RefID: 2697, Depressed farmers should have access to firearms restricted  
  
Level: 2, State: Excluded

RefID: 3003, The Mexican-American Migrant Farmworker Family - Mental-Health Issues  
M. L. D. Siantz  
Level: 2, State: Excluded

RefID: 3184, Agriculture and the Depressed Areas  
M. Olson  
Level: 2, State: Excluded

RefID: 3701, Health in rural Canada / edited by Judith C. Kulig and Allison M. Williams  
Judith Celene Kulig, Allison Williams  
Level: 2, State: Excluded

RefID: 3790, Depression and Poverty Among Rural Women: A Relationship of Social Causation  
or Social Selection  
Leigh A. Simmons, Bonnie Braun, Richard Charnigo, Jennifer R. Havens, David W. Wright  
Level: 2, State: Excluded

RefID: 3856, Critical issues in rural health / edited by Nina Glasgow, Lois Wright Morton, Nan  
E. Johnson  
Nina Glasgow, Nan E. Johnson, Lois Wright Morton  
Level: 2, State: Excluded

RefID: 3858, Economic hardship, religion and mental health during the midwestern farm crisis  
Katherine Meyer, Linda Lobao  
Level: 2, State: Excluded

RefID: 3956, Financial strain and depression among farm operators: the role of perceived  
economic hardship and personal control  
P. S. Armstrong, M. D. Schulman  
Level: 2, State: Excluded

RefID: 5001, Reducing stress to minimize injury: the nation's first employee assistance program  
for dairy farmers  
S. Dickens, E. Dotter, M. Handy, L. Waterman  
Level: 2, State: Excluded

RefID: 5139, Active coping, personal satisfaction, and attachment to land in older African-  
American farmers

S. A. Maciuba, S. C. Westneat, D. B. Reed  
Level: 2, State: Excluded

RefID: 5648, The interrelation between organophosphate toxicity and the epidemiology of depression and suicide  
K. Jaga, C. Dharmani  
Level: 2, State: Excluded

RefID: 5689, Depression and pesticide exposures in female spouses of licensed pesticide applicators in the agricultural health study cohort  
C. Beseler, L. Stallones, J. A. Hoppin, M. C. Alavanja, A. Blair, T. Keefe, F. Kamel  
Level: 2, State: Excluded

RefID: 6117, Forensic psychiatric services in British Columbia  
D. Eaves, D. Lamb, G. Tien  
Level: 2, State: Excluded

RefID: 6217, The occupational health status of hired farm workers  
D. Villarejo, S. L. Baron  
Level: 2, State: Excluded

RefID: 6581, Mental health and illness nursing in rural Vermont: case illustration of a farm family  
B. P. Hamel-Bissell  
Level: 2, State: Excluded

RefID: 6599, Psychology and rural America. Current status and future directions  
J. D. Murray, P. A. Keller  
Level: 2, State: Excluded

RefID: 6801, Urbanicity and depression reconsidered. The evidence regarding depressive symptomatology  
J. A. Neff  
Level: 2, State: Excluded

RefID: 7598, High risk of depression among low-income women raises awareness about treatment options  
Amy Block Joy, Mark Hudes  
Level: 2, State: Excluded

**Does not attempt to quantify depression in a farming population**

RefID: 74, Water torture: Unravelling the psychological distress of irrigators in Australia  
S. A. Wheeler, A. Zuo, A. Loch  
Level: 2, State: Excluded

RefID: 78, Burnout and hopelessness among farmers: The Farmers Stressors Inventory  
D. Truchot, M. Andela  
Level: 2, State: Excluded

RefID: 84, Mental Health Conceptualization and Resilience Factors in the Kalasha Youth: An Indigenous Ethnic and Religious Minority Community in Pakistan  
F. R. Choudhry, T. M. Khan, M. S. A. Park, K. J. Golden  
Level: 2, State: Excluded

RefID: 85, Online assessment of suicide stigma, literacy and effect in Australia's rural farming community  
A. J. Kennedy, S. A. Brumby, V. L. Versace, T. Brumby-Rendell  
Level: 2, State: Excluded

RefID: 97, Internal migration and mental health of the second generation. The case of Turin in the age of the Italian economic miracle  
M. Cardano, C. Scarinzi, G. Costa, A. d'Errico  
Level: 2, State: Excluded

RefID: 116, "The Masks We Wear": A Qualitative Study of Suicide in Australian Farmers  
L. Kunde, K. Kolves, B. Kelly, P. Reddy, D. de Leo  
Level: 2, State: Excluded

RefID: 124, Overview on the Burnout Rate of Romanian Farmers  
I. Zaharia, L. Reissig, G. Fintineru, A. M. Iorga  
Level: 2, State: Excluded

RefID: 130, The effects of climate variability on psychological well-being in India  
S. Pailler, M. Tsaneva  
Level: 2, State: Excluded

RefID: 138, Integration anxiety: The cognitive isolation of climate change  
K. M. Findlater, S. D. Donner, T. Satterfield, M. Kandlikar  
Level: 2, State: Excluded

RefID: 141, Evolving parent-adult child relations: location of multiple children and psychological well-being of older adults in China  
Z. Lin, F. Chen  
Level: 2, State: Excluded

RefID: 149, Work routines moderate the association between eveningness and poor psychological well-being

F. G. Carvalho, C. M. de Souza, M. P. L. Hidalgo  
Level: 2, State: Excluded

RefID: 151, What's up with the self-employed? A cross-national perspective on the self-employed's work-related mental well-being  
J. Gevaert, D. De Moortel, M. Wilkens, C. Vanroelen  
Level: 2, State: Excluded

RefID: 171, Length of Stay of Psychiatric Admissions in a Tertiary Care Hospital  
M. Basnet, N. Sapkota, S. Limbu, D. Baral  
Level: 2, State: Excluded

RefID: 175, Case Control Study of Impulsivity, Aggression, Pesticide Exposure and Suicide Attempts Using Pesticides among Farmers  
C. P. Lyu, J. R. Pei, L. C. Beseler, Y. L. Li, J. H. Li, M. Ren, L. Stallones, S. P. Ren  
Level: 2, State: Excluded

RefID: 185, Farmers' perceptions of coexistence between agriculture and a large scale coal seam gas development  
N. I. Huth, B. Cocks, N. Dalgliesh, P. L. Poulton, O. Marinoni, J. N. Garcia  
Level: 2, State: Excluded

RefID: 204, The prevalence, age-of-onset and the correlates of DSM-IV psychiatric disorders in the Tianjin Mental Health Survey (TJMHS)  
H. Yin, G. Xu, H. Tian, G. Yang, K. J. Wardenaar, R. A. Schoevers  
Level: 2, State: Excluded

RefID: 211, Quality of life and mental health among Thai older workers in community enterprises  
S. Hanklang, P. Ratanasiripong, S. Naksranoi, S. Sathira-Anant, K. Patanasri  
Level: 2, State: Excluded

RefID: 215, Generating toxic landscapes: impact on well-being of cotton farmers in Telangana, India  
N. K. Kannuri, S. Jadhav  
Level: 2, State: Excluded

RefID: 216, Farmers's perception and strategies for the development of sustainable livelihoods in disaster prone areas  
S. Anantanyu, Suwanto, Suminah  
Level: 2, State: Excluded

RefID: 224, Psychological distance of climate change and mental health risks assessment of smallholder farmers in Northern Ghana: Is habituation a threat to climate change?  
J. W. Acharibasam, S. W. Anuga  
Level: 2, State: Excluded

RefID: 228, Emotions, attitudes, and appraisal in the management of climate-related risks by fish farmers in Northern Thailand

L. Lebel, P. Lebel

Level: 2, State: Excluded

RefID: 230, Toxic Effects of Exposure to Pesticides in Farm Workers in Navolato, Sinaloa (Mexico)

J. G. Galindo-Reyes, H. Alegria

Level: 2, State: Excluded

RefID: 234, Job Resources and Work Engagement among Finnish Dairy Farmers

M. K. Kallioniemi, J. Kaseva, C. L. Kolstrup, A. Simola, H. R. Kymalainen

Level: 2, State: Excluded

RefID: 238, Exploring perspectives of well-being in Latina/o migrant workers

R. B. Herbst, R. M. Gonzalez-Guarda

Level: 2, State: Excluded

RefID: 243, Association among Occupational Stress factors and Performance at workplace among Agricultural Research Sector Employees at Hyderabad, India

K. D. V. Prasad, R. Vaidya, V. A. Kumar

Level: 2, State: Excluded

RefID: 249, Migrant perinatal depression study: a prospective cohort study of perinatal depression on the Thai-Myanmar border

G. Fellmeth, E. H. Plugge, V. Carrara, M. Fazel, M. May, Y. Phichitphadungtham, M.

Pimanpanarak, N. K. Wai, O. Mu, P. Charunwatthana, F. Nosten, R. Fitzpatrick, R. McGready

Level: 2, State: Excluded

RefID: 253, The salivary alpha amylase awakening response is related to over-commitment

P. Eddy, E. H. Wertheim, M. W. Hale, B. J. Wright

Level: 2, State: Excluded

RefID: 260, Health and Safety in Organic Farming: A Qualitative Study

F. S. Mas, A. J. Handal, R. E. Rohrer, E. T. Viteri

Level: 2, State: Excluded

RefID: 261, Oral history and farmworker studies

J. Hagood, C. Schriemer

Level: 2, State: Excluded

RefID: 269, Farm suicides in New Zealand, 2007-2015: A review of coroners' records

A. L. Beautrais

Level: 2, State: Excluded

RefID: 280, Criteria and indicators for foot and mouth disease control strategy decision-making in Asia-Oceania countries

E. Kim, T. Carpenter, S. Rowanowski, N. Cogger

Level: 2, State: Excluded

RefID: 303, Epidemiology of severe mental illness in Hunan province in central China during 2014-2015: A multistage cross-sectional study

D. X. Wang, J. Ma, L. H. Tan, Y. Chen, X. S. Li, X. F. Tian, X. H. Zhou, X. J. Liu

Level: 2, State: Excluded

RefID: 310, Depressive symptoms among land expropriated farmers: evidence from China

Y. Mizushima

Level: 2, State: Excluded

RefID: 319, Factors increasing the risk for psychosocial stress among Korean adults living in rural areas: using generalized estimating equations and mixed models

J. H. Nam, M. S. Lim, H. K. Choi, J. Y. Kim, S. K. Kim, S. S. Oh, S. B. Koh, H. T. Kang

Level: 2, State: Excluded

RefID: 350, "Do it All by Myself": A Salutogenic Approach of Masculine Health Practice Among Farming Men Coping With Stress

P. Roy, G. Tremblay, S. Robertson, J. Houle

Level: 2, State: Excluded

RefID: 381, Farmer suicides: a qualitative study from Australia

M. Perceval, K. Kolves, P. Reddy, D. De Leo

Level: 2, State: Excluded

RefID: 385, Belonging and Mental Wellbeing Among a Rural Indian-Canadian Diaspora: Navigating Tensions in "Finding a Space of Our Own"

C. S. Caxaj, N. K. Gill

Level: 2, State: Excluded

RefID: 415, Suicide attempters with high and low suicide intent: Different populations in rural China

B. P. Liu, X. T. Wang, C. X. Jia

Level: 2, State: Excluded

RefID: 441, Influence of socio-economic and psychosocial factors on food insecurity and nutritional status of older adults in FELDA settlement in Malaysia

R. S. Hudin, S. Shahar, N. Ibrahim, H. M. Yahaya

Level: 2, State: Excluded

RefID: 446, Oxidative stress and cholinesterase depression among farm workers occupationally exposed to pesticides in India

M. Fareed, C. N. Kesavachandran, V. Bihari, R. Kamal, M. Kuddus



Level: 2, State: Excluded

RefID: 457, Comparison of neurological health outcomes between two adolescent cohorts exposed to pesticides in Egypt

A. A. Ismail, M. R. Bonner, O. Hendy, G. A. Rasoul, K. Wang, J. R. Olson, D. S. Rohlman

Level: 2, State: Excluded

RefID: 465, Climate change threats to family farmers' sense of place and mental wellbeing: A case study from the Western Australian Wheatbelt

N. R. Ellis, G. A. Albrecht

Level: 2, State: Excluded

RefID: 471, Immigration policies and mental health morbidity among Latinos: A state-level analysis

M. L. Hatzenbuehler, S. J. Prins, M. Flake, M. Philbin, M. S. Frazer, D. Hagen, J. Hirsch

Level: 2, State: Excluded

RefID: 510, GoodYarn: building mental health literacy in New Zealand's rural workforce

K. Morgaine, L. Thompson, K. Jahnke, R. Llewellyn

Level: 2, State: Excluded

RefID: 530, Prevalence of serious psychological distress among slaughterhouse workers at a United States beef packing plant

J. H. Leibler, P. A. Janulewicz, M. J. Perry

Level: 2, State: Excluded

RefID: 564, Communal farmers' perception of drought in South Africa: Policy implication for drought risk reduction

Y. T. Bahta, A. Jordaan, F. Muyambo

Level: 2, State: Excluded

RefID: 581, Depression among migrant workers in Al-Qassim, Saudi Arabia

W. Nadim, A. AlOtaibi, A. Al-Mohaimeed, M. Ewid, M. Sarhandi, J. Saquib, K. Alhumdi, A. Alharbi, A. Taskin, M. Migdad, J. Alshammari, S. Alharbi, N. Saquib

Level: 2, State: Excluded

RefID: 620, The Red Blood Cell Acetylcholinesterase Levels of Depressive Patients with Suicidal Behavior in an Agricultural Area

V. Altinyazar, F. B. Sirin, R. Sutcu, I. Eren, I. K. Omurlu

Level: 2, State: Excluded

RefID: 634, Exposure to pesticides and mental disorders in a rural population of Southern Brazil

E. Campos, V. D. P. da Silva, M. S. C. de Mello, U. B. Otero

Level: 2, State: Excluded

RefID: 659, Analysis of factors associated with hesitation to restart farming after depopulation of

animals due to 2010 foot-and-mouth disease epidemic in Japan  
H. Kadowaki, T. Kayano, T. Tobinaga, A. Tsutsumi, M. Watari, K. Makita  
Level: 2, State: Excluded

RefID: 661, "Watching the bank balance build up then blow away and the rain clouds do the same": A thematic analysis of South Australian farmers' sources of stress during drought  
K. M. Fennell, C. E. Jarrett, L. J. Kettler, J. Dollman, D. A. Turnbull  
Level: 2, State: Excluded

RefID: 672, Prevalence and treatment coverage for depression: a population-based survey in Vidarbha, India  
R. Shidhaye, S. P. Gangale, V. Patel  
Level: 2, State: Excluded

RefID: 719, A case-control study of psychological distress in survivors of farmers' suicides in Wardha District in central India  
M. C. Bhise, P. B. Behere  
Level: 2, State: Excluded

RefID: 772, Occupational differences in suicide mortality among Japanese men of working age  
K. Wada, H. Eguchi, D. Prieto-Merino, D. R. Smith  
Level: 2, State: Excluded

RefID: 807, Suicide Among Farmers in France: Occupational Factors and Recent Trends  
C. Bossard, G. Santin, I. G. Canu  
Level: 2, State: Excluded

RefID: 819, Geographic variation in suicide rates in Australian farmers: Why is the problem more frequent in Queensland than in New South Wales?  
U. Arnautovska, S. McPhedran, B. Kelly, P. Reddy, D. De Leo  
Level: 2, State: Excluded

RefID: 836, Prevalence of Diabetes and Health-Related Quality of Life Among Rural-to-Urban Nong Zhuan Fei Migrants in an Urban Area of Northern China, 2013  
S. Yan, X. C. Hong, H. Q. Yu, Z. Yang, S. Y. Liu, W. Quan, J. K. Xu, L. Y. Zhu, W. L. Cheng, H. Xiao, H. Kitzman-Ulrich, M. J. DeHaven  
Level: 2, State: Excluded

RefID: 848, Reflecting the interface between rural work and mental health of citriculture workers  
A. C. Santos, S. A. Menta  
Level: 2, State: Excluded

RefID: 851, Maternal depression and malnutrition in children in southwest Uganda: a case control study  
S. Ashaba, G. Z. Rukundo, F. Beinempaka, M. Ntaro, J. C. LeBlanc  
Level: 2, State: Excluded

RefID: 878, Functional Disability and Social Conflict Increase Risk of Depression in Older Adulthood Among Bolivian Forager-Farmers

J. Stieglitz, E. Schniter, C. von Rueden, H. Kaplan, M. Gurven

Level: 2, State: Excluded

RefID: 908, Housing and Neighborhood Characteristics and Latino Farmworker Family Well-Being

T. A. Arcury, G. Trejo, C. K. Suerken, J. G. Grzywacz, E. H. Ip, S. A. Quandt

Level: 2, State: Excluded

RefID: 934, Effect of subjective economic status on psychological distress among farmers and non-farmers of rural China

D. J. Feng, L. Q. Ji, L. Z. Xu

Level: 2, State: Excluded

RefID: 1014, Pesticide exposure and health conditions of terrestrial pesticide applicators in Cordoba Province, Argentina

M. Butinof, R. A. Fernandez, M. I. Stimolo, M. J. Lantieri, M. Blanco, A. L. Machado, G. Franchini, M. D. Diaz

Level: 2, State: Excluded

RefID: 1031, The Impact of Drought on Mental Health in Rural and Regional Australia

B. Edwards, M. Gray, B. Hunter

Level: 2, State: Excluded

RefID: 1103, Work Organization and Health Among Immigrant Women: Latina Manual Workers in North Carolina

T. A. Arcury, J. G. Grzywacz, H. Y. Chen, D. C. Mora, S. A. Quandt

Level: 2, State: Excluded

RefID: 1105, Association between pesticide exposure and suicide rates in Brazil

N. M. X. Faria, A. G. Fassa, R. D. Meucci

Level: 2, State: Excluded

RefID: 1117, Stress and Sociocultural Factors Related to Health Status Among US-Mexico Border Farmworkers

S. Carvajal, C. Kibor, D. McClelland, M. Ingram, J. G. de Zapien, E. Torres, F. Redondo, K. Rodriguez, R. Rubio-Goldsmith, J. Meister, C. Rosales

Level: 2, State: Excluded

RefID: 1125, The Prevalence and Correlates of Lifetime Psychiatric Disorders and Trauma Exposures in Urban and Rural Settings: Results from the National Comorbidity Survey Replication (NCS-R)

J. S. McCall-Hosenfeld, S. Mukherjee, E. B. Lehman

Level: 2, State: Excluded

RefID: 1131, Work Ability Index (WAI) and Its Health-related Determinants among Iranian Farmers Working in Small Farm Enterprises

A. Rostamabadi, A. Mazloumi, A. R. Foroushani

Level: 2, State: Excluded

RefID: 1152, Health Needs Assessment of Older People in an Agricultural Plantation

N. C. Din, S. E. Ghazali, N. Ibrahim, M. Ahmad, Z. Said, A. R. Ghazali, R. Razali, S. Shahar

Level: 2, State: Excluded

RefID: 1155, Suicide Mortality Among Agricultural Workers in a Region With Intensive Tobacco Farming and Use of Pesticides in Brazil

N. Krawczyk, A. Meyer, M. Fonseca, J. Lima

Level: 2, State: Excluded

RefID: 1169, The effectiveness of a community-based health promotion program for rural elders: A quasi-experimental design

J. Wang, C. Y. Chen, L. J. Lai, M. L. Chen, M. Y. Chen

Level: 2, State: Excluded

RefID: 1207, Drought as a mental health exposure

L. V. Obrien, H. L. Berry, C. Coleman, I. C. Hanigan

Level: 2, State: Excluded

RefID: 1224, A regional approach to understanding farmer suicide rates in Queensland

U. Arnautovska, S. McPhedran, D. De Leo

Level: 2, State: Excluded

RefID: 1261, Are social security policies for Chinese landless farmers really effective on health in the process of Chinese rapid urbanization? a study on the effect of social security policies for Chinese landless farmers on their health-related quality of life

Y. Liang, W. Y. Lu, W. Wu

Level: 2, State: Excluded

RefID: 1274, Association between pain and agricultural workload

L. P. Rocha, M. R. Cezar-Vaz, M. C. V. de Almeida, D. R. Piexak, C. A. Bonow

Level: 2, State: Excluded

RefID: 1300, Health symptoms related to pesticide exposure and agricultural tasks among rice farmers from northern Thailand

R. Sapbamrer, S. Nata

Level: 2, State: Excluded

RefID: 1328, Miseries Suffered, Unvoiced, Unknown? Communication of Suicidal Intent by Men in "Rural" Queensland, Australia

S. McPhedran, D. De Leo

Level: 2, State: Excluded

RefID: 1342, Characteristics of Chinese rural young suicides by pesticides

J. Zhang, Z. Y. Li

Level: 2, State: Excluded

RefID: 1415, Alcohol Consumption, Obesity, and Psychological Distress in Farming Communities-An Australian Study

S. Brumby, A. Kennedy, A. Chandrasekara

Level: 2, State: Excluded

RefID: 1425, Stress, Depression and Coping among Latino Migrant and Seasonal Farmworkers

S. B. Winkelman, E. H. Chaney, J. W. Bethel

Level: 2, State: Excluded

RefID: 1428, Prevalence and Risk Factor of Neck Pain in Elderly Korean Community Residents

K. M. Son, N. H. Cho, S. H. Lim, H. A. Kim

Level: 2, State: Excluded

RefID: 1438, Loneliness and depression among the elderly in an agricultural settlement: Mediating effects of social support

Wmywm Azam, N. C. Din, M. Ahmad, S. E. Ghazali, N. Ibrahim, Z. Said, A. R. Ghazali, S. Shahar, R. Razali, T. Maniam

Level: 2, State: Excluded

RefID: 1458, Battling Discrimination and Social Isolation: Psychological Distress Among Latino Day Laborers

N. J. Negi

Level: 2, State: Excluded

RefID: 1476, Factors associated with health-related quality of life among Indian women in mining and agriculture

M. S. D'Souza, S. N. Karkada, G. Somayaji

Level: 2, State: Excluded

RefID: 1549, Farmers' stress and coping in a time of drought

K. M. Gunn, L. J. Kettler, G. L. A. Skaczkowski, D. A. Turnbull

Level: 2, State: Excluded

RefID: 1578, Psychological Morbidity of Farmers and Non-farming Population: Results from a UK Survey

B. Hounsome, R. T. Edwards, N. Hounsome, G. Edwards-Jones

Level: 2, State: Excluded

RefID: 1589, Health and aging in elderly farmers: the AMI cohort

K. Peres, F. Matharan, M. Allard, H. Amieva, I. Baldi, P. Barberger-Gateau, V. Bergua, I.

Bourdel-Marchasson, C. Delcourt, A. Foubert-Samier, A. Fourrier-Reglat, M. Gaimard, S. Laberon, C. Maubaret, V. Postal, C. Chantal, M. Rainfray, N. Rasclé, J. F. Dartigues  
Level: 2, State: Excluded

RefID: 1594, Sickness absence due to mental health disorders-a societal perspective  
C. A. M. Roelen, W. van Rhenen, P. C. Koopmans, U. Bultmann, J. W. Groothoff, J. J. L. van der Klink  
Level: 2, State: Excluded

RefID: 1604, The psychosocial stress model for Thai contract farmers under globalization: a Path analysis model  
C. Kaewanuchit, C. Muntaner, S. Dendoung, R. Labonte, C. Suttawet, W. Chiengkul  
Level: 2, State: Excluded

RefID: 1683, Health Status of Migrant Farmworkers in the Shenandoah Valley  
N. Kelly, D. Glick, P. Kulbok, L. Clayton, V. Rovnyak  
Level: 2, State: Excluded

RefID: 1693, Family farming workers mental health in a microrregion in southern Brazil  
A. R. Poletto, L. A. Gontijo  
Level: 2, State: Excluded

RefID: 1760, Rapid change, climate adversity and the next 'big dry': Older farmers' mental health  
J. D. Polain, H. L. Berry, J. O. Hoskin  
Level: 2, State: Excluded

RefID: 1763, Suicide in a poor rural community in the Western Cape, South Africa: experiences of five suicide attempters and their families  
Z. Holtman, S. Shelmerdine, L. London, A. Flisher  
Level: 2, State: Excluded

RefID: 1780, Identifying Psychosocial Stressors of Well-Being and Factors Related to Substance Use Among Latino Day Laborers  
N. J. Negi  
Level: 2, State: Excluded

RefID: 1798, Suicide in Australian pesticide-exposed workers  
E. MacFarlane, P. Simpson, G. Benke, M. R. Sim  
Level: 2, State: Excluded

RefID: 1863, Social capital and self-rated health in Colombia: The good, the bad and the ugly  
D. Hurtado, I. Kawachi, J. Sudarsky  
Level: 2, State: Excluded

RefID: 1899, Acculturative stress as a risk factor of depression and anxiety in the Latin American immigrant population

H. W. Revollo, A. Qureshi, F. Collazos, S. Valero, M. Casas  
Level: 2, State: Excluded

RefID: 1953, Maternal Predictors of Behavioral Problems Among Mexican Migrant Farmworker Children  
M. L. D. Siantz, N. Coronado, T. Dovydaitis  
Level: 2, State: Excluded

RefID: 1954, Medically reported work-related ill-health in the UK agricultural sector  
S. J. Stocks, S. Turner, M. Carder, L. Hussey, R. McNamee, R. M. Agius  
Level: 2, State: Excluded

RefID: 1960, Mental Health in Immigrants From Nontraditional Receiving Sites  
L. Kiang, J. G. Grzywacz, A. J. Marin, T. A. Arcury, S. A. Quandt  
Level: 2, State: Excluded

RefID: 1963, Job Demands and Pesticide Exposure Among Immigrant Latino Farmworkers  
J. G. Grzywacz, S. A. Quandt, Q. M. Vallejos, L. E. Whalley, H. Y. Chen, S. Isom, D. B. Barr, T. A. Arcury  
Level: 2, State: Excluded

RefID: 1974, Financial problems and psychological distress: Investigating reciprocal effects among business owners  
M. J. Gorgievski, A. B. Bakker, W. B. Schaufeli, H. B. van der Veen, C. W. M. Giesen  
Level: 2, State: Excluded

RefID: 1994, Day Laborers and Occupational Stress: Testing the Migrant Stress Inventory With a Latino Day Laborer Population  
M. R. Duke, B. Bourdeau, J. D. Hovey  
Level: 2, State: Excluded

RefID: 2016, Acculturative Stress, Depression, and Anxiety in Migrant Farmwork College Students of Mexican Heritage  
O. L. Mejia, C. J. McCarthy  
Level: 2, State: Excluded

RefID: 2048, Mood Disorders Hospitalizations, Suicide Attempts, and Suicide Mortality Among Agricultural Workers and Residents in an Area With Intensive Use of Pesticides in Brazil  
A. Meyer, S. Koifman, R. J. Koifman, J. C. Moreira, J. D. Chrisman, Y. Abreu-Villaca  
Level: 2, State: Excluded

RefID: 2098, Clinical leadership in rural psychiatry: Farmers' mental health and well-being  
T. Robinson, H. Kurtz, B. Kelly, J. Fuller, L. Fragar, S. Roy, K. Deans, J. Croft, B. Hedger  
Level: 2, State: Excluded

RefID: 2130, Stress and help-seeking for drought-stricken citrus growers in the Riverland of

South Australia

A. K. Staniford, M. F. Dollard, B. Guerin

Level: 2, State: Excluded

RefID: 2154, Measuring Job Characteristics and Mental Health Among Latino Farmworkers: Results from Cognitive Testing

J. G. Grzywacz, T. Alterman, C. Muntaner, S. Gabbard, J. Nakamoto, D. J. Carroll

Level: 2, State: Excluded

RefID: 2214, Children's behavioral traits and risk of injury: Analyses from a case-control study of agricultural households

K. F. Carlson, S. G. Gerberich, B. H. Alexander, A. S. Masten, T. R. Church, J. M. Shutske, A. D. Ryan, C. M. Renier

Level: 2, State: Excluded

RefID: 2217, The Psychosocial and Socioeconomic Consequences of Bovine Spongiform Encephalopathy (BSE): A Community Impact Study

D. Mitra, C. Amaratunga, R. Sutherns, V. Pletsch, W. Corneil, S. Crowe, D. Krewski

Level: 2, State: Excluded

RefID: 2237, Mental health of farmers in Southern Queensland: Issues and support

D. Hossain, R. Eley, J. Coutts, D. Gorman

Level: 2, State: Excluded

RefID: 2249, Water insecurity and emotional distress: Coping with supply, access, and seasonal variability of water in a Bolivian squatter settlement

A. Wutich, K. Ragsdale

Level: 2, State: Excluded

RefID: 2263, Improving mental health capacity in rural communities: Mental health first aid delivery in drought-affected rural New South Wales

G. M. Sartore, B. Kelly, H. J. Stain, J. Fuller, L. Fragar, A. Tonna

Level: 2, State: Excluded

RefID: 2274, Depressive symptoms in youth heads of household in Rwanda - Correlates and implications for intervention

N. W. Boris, L. A. Brown, T. R. Thurman, J. C. Rice, L. M. Snider, J. Ntaganira, L. N. Nyirazinyoye

Level: 2, State: Excluded

RefID: 2277, Farm Family Coping with Stress: The Impact of the 1998 Ice Storm

L. A. Sutherland, T. Glendinning

Level: 2, State: Excluded

RefID: 2299, Patterns of suicide by occupation in England and Wales: 2001-2005

H. Meltzer, C. Griffiths, A. Brock, C. Rooney, R. Jenkins



Level: 2, State: Excluded

RefID: 2302, Functioning in neck and low back pain from a 12-year perspective: A prospective population-based study

A. Thelin, S. Holmberg, N. Thelin

Level: 2, State: Excluded

RefID: 2315, The big dry: The link between rural masculinities and poor health outcomes for farming men

M. Alston, J. Kent

Level: 2, State: Excluded

RefID: 2323, Determinants of health in seasonal migrants: Coffee harvesters in Los santos, Costa Rica

R. L. Bolanos, T. Partanen, M. Berrocal, B. Alvarez, L. Cordoba

Level: 2, State: Excluded

RefID: 2344, Quality of life, work ability, and self employment: a population survey of entrepreneurs, farmers, and salary earners

S. I. Saarni, E. S. Saarni, H. Saarni

Level: 2, State: Excluded

RefID: 2362, Nerves as Embodied Metaphor in the Canada/Mexico Seasonal Agricultural Workers Program

A. Mysyk, M. England, J. A. A. Gallegos

Level: 2, State: Excluded

RefID: 2401, Anthropological and psychological merge: Design of a stress measure for Mexican farmworkers

S. A. Snipes, B. Thompson, K. O'Connor, R. Godina, G. Ibarra

Level: 2, State: Excluded

RefID: 2409, A sense of coherence and health. Salutogenesis in a societal context: Aland, a special case?

M. Eriksson, B. Lindstrom, J. Lilja

Level: 2, State: Excluded

RefID: 2425, Pesticide practices and suicide among farmers of the Sundarban region in India

A. N. Chowdhury, S. Banerjee, A. Brahma, M. G. Weiss

Level: 2, State: Excluded

RefID: 2446, Mortality among pesticide applicators exposed to chlorpyrifos in the agricultural health study

W. J. Lee, M. C. R. Alavanja, J. A. Hoppin, J. A. Rusiecki, F. Kamel, A. Blair, D. P. Sandler

Level: 2, State: Excluded

RefID: 2517, Depressive symptoms normal elderly and associated factors in a cognitively population: the Tajiri Project

H. Ambo, K. Meguro, J. Ishizaki, M. Shimada, S. Yamaguchi, Y. Sekita, A. Yamadori

Level: 2, State: Excluded

RefID: 2520, Acute health effects of organophosphorus pesticides on Tanzanian small-scale coffee growers

A. V. F. Ngowi, D. N. Maeda, T. J. Partanen, M. P. Sanga, G. Mbise

Level: 2, State: Excluded

RefID: 2571, Relationship between diagnostic subtypes of depression and occupation in Japan

K. Otsuka, S. Kato

Level: 2, State: Excluded

RefID: 2588, The impact of urbanization on physical, physiological and mental health of Africans in the North West Province of South Africa: the THUSA study

H. H. Vorster, M. P. Wissing, C. S. Venter, H. S. Kruger, A. Kruger, N. T. Malan, J. H. de Ridder, F. J. Veldman, H. S. Steyn, B. M. Margetts, U. MacIntyre

Level: 2, State: Excluded

RefID: 2641, The coping inventory for stressful situations: Factorial structure and associations with personality traits and psychological health

R. Cosway, N. S. Endler, A. J. Sadler, I. J. Deary

Level: 2, State: Excluded

RefID: 2675, Pesticide-related health problems and diseases among farmers in the United Arab Emirates

M. M. M. Beshwari, A. Bener, A. Ameen, A. M. Al-Mehdi, H. Z. Ouda, M. A. H. Pasha

Level: 2, State: Excluded

RefID: 2695, Health and safety practices among farmers and other workers: a needs assessment

A. Hope, C. Kelleher, L. Holmes, T. Hennessy

Level: 2, State: Excluded

RefID: 2746, Suicide mortality and pesticide use among Canadian farmers

W. Pickett, W. D. King, R. E. M. Lees, M. Bienefeld, H. I. Morrison, R. J. Brison

Level: 2, State: Excluded

RefID: 2749, Methods used for suicide by farmers in England and Wales - The contribution of availability and its relevance to prevention

K. Hawton, J. Fagg, S. Simkin, L. Harriss, A. Malmberg

Level: 2, State: Excluded

RefID: 2798, Rural-urban women's experience of symptoms of depression related to economic hardship

B. J. Craft, D. R. Johnson, S. T. Ortega

Level: 2, State: Excluded

RefID: 2888, Increased risk of suicide with exposure to pesticides in an intensive agricultural area. A 12-year retrospective study

T. Parron, A. F. Hernandez, E. Villanueva

Level: 2, State: Excluded

RefID: 2897, Health and mental health among Mexican American migrants: Implications for survey research

R. D. Baer

Level: 2, State: Excluded

RefID: 2913, The impact of the environment on physical and mental health

A. G. Gallagher, K. Tierney

Level: 2, State: Excluded

RefID: 2924, Psychological distress and size of place: The epidemiology of rural economic stress

D. R. Hoyt, D. Odonnell, K. Y. Mack

Level: 2, State: Excluded

RefID: 3078, Major Depression in a Nonclinical Sample - Demographic and Clinical Risk-Factors for 1st Onset

W. Coryell, J. Endicott, M. Keller

Level: 2, State: Excluded

RefID: 3161, Mental-Health of North-Dakota Farm and Ranch Women - What Makes a Difference

H. Light, D. Hertsgaard, R. Hanson

Level: 2, State: Excluded

RefID: 3194, Differential Depression Effects on Families of Laborers, Farmers, and the Business Class a Survey of an Iowa Town

L. M. Conard

Level: 2, State: Excluded

RefID: 3248, "The Masks We Wear": A Qualitative Study of Suicide in Australian Farmers

Lisa Kunde, Brian Kelly, Diego de Leo, Kõlves Kairi, Prasuna Reddy

Level: 2, State: Excluded

RefID: 3249, Health and Well-Being Among Young People From Canadian Farms: Associations With a Culture of Risk-Taking

William Pickett, Barbara Marlenga, Richard L. Berg

Level: 2, State: Excluded

RefID: 3392, Farm exit intention and wellbeing: A study of Australian farmers

Dominic Peel, Helen L. Berry, Jacki Schirmer

Level: 2, State: Excluded

RefID: 3452, Development of the Seasonal Migrant Agricultural Worker Stress Scale in Sanliurfa, Southeast Turkey

Zeynep Simsek, Fatma Ersin, Evin Kirmizitoprak

Level: 2, State: Excluded

RefID: 3475, An Investigation into the Human Element of On-farm Animal Welfare Incidents in Ireland

Catherine Devitt, Patricia Kelly, Martin Blake, Alison Hanlon, Simon J. More

Level: 2, State: Excluded

RefID: 3541, Help-seeking among Male Farmers: Connecting Masculinities and Mental Health

Philippe Roy, Gilles Tremblay, Steven Robertson

Level: 2, State: Excluded

RefID: 3565, Worker welfare on Kenyan export vegetable farms

Christoph R. Ehlert, MithÄ¶fer Dagmar, Hermann Waibel

Level: 2, State: Excluded

RefID: 3578, Economies, ethics and emotions: Farmer distress within the moral economy of agribusiness

Lia Bryant, Bridget Garnham

Level: 2, State: Excluded

RefID: 3621, Beyond discourses of drought: The micro-politics of the wine industry and farmer distress

Lia Bryant, Bridget Garnham

Level: 2, State: Excluded

RefID: 3664, The social experience of drought in rural Iran

Marzieh Keshavarz, Ezatollah Karami, Frank Vanclay

Level: 2, State: Excluded

RefID: 3684, Cardiovascular risk factors and psychological distress in Australian farming communities

Susan Brumby, Ananda Chandrasekara, Scott McCoombe, Peter Kremer, Paul Lewandowski

Level: 2, State: Excluded

RefID: 3731, The Hidden Health Burden of Environmental Degradation: Disease Comorbidities and Dryland Salinity

Peter C. Speldewinde, Angus Cook, Peter Davies, Philip Weinstein

Level: 2, State: Excluded

RefID: 3798, Psychosocial work environment among employed Swedish dairy and pig farmworkers

Christina Kolstrup, Peter Lundqvist, Stefan Pinzke  
Level: 2, State: Excluded

RefID: 3822, A note on the effect of farmer mental health on adoption: The case of agri-environment schemes  
B. Hounsome, R. T. Edwards, G. Edwards-Jones  
Level: 2, State: Excluded

RefID: 3851, Stress among migrant and seasonal farmworkers in rural southeast North Carolina  
Y. S. Kim-Godwin, G. A. Bechtel  
Level: 2, State: Excluded

RefID: 3899, The Farm Partners program: addressing the problem of occupational stress in agriculture  
J. J. May  
Level: 2, State: Excluded

RefID: 4026, Variation in subjective well-being among black migrant farm workers in New York  
P. S. K. Chi  
Level: 2, State: Excluded

RefID: 4302, The Mental Health of the Organic Farmer: Psychosocial and Contextual Actors  
C. Brigance, F. Soto Mas, V. Sanchez, A. J. Handal  
Level: 2, State: Excluded

RefID: 4309, Midwestern Farm Widows: Adaptation Following Spousal Loss  
J. W. Steinberg, G. M. Roux  
Level: 2, State: Excluded

RefID: 4416, Are work demands associated with mental distress? Evidence from women in rural India  
R. A. Richardson, A. Nandi, S. Jaswal, S. Harper  
Level: 2, State: Excluded

RefID: 4478, A comparison of barriers to mental health support-seeking among farming and non-farming adults in rural South Australia  
M. J. Hull, K. M. Fennell, K. Vallury, M. Jones, J. Dollman  
Level: 2, State: Excluded

RefID: 4506, Trends and Characteristics of Occupational Suicide and Homicide in Farmers and Agriculture Workers, 1992-2010  
W. Ringgenberg, C. Peek-Asa, K. Donham, M. Ramirez  
Level: 2, State: Excluded

RefID: 4564, Improving Health Care for Spanish-Speaking Rural Dairy Farm Workers  
C. Buckheit, D. Pineros, A. Olson, D. Johnson, S. Genereaux

Level: 2, State: Excluded

RefID: 4638, Health Needs Assessment of Plain Populations in Lancaster County, Pennsylvania  
K. Miller, B. Yost, C. Abbott, S. Thompson, E. Dlugi, Z. Adams, M. Schulman, N. Strauss  
Level: 2, State: Excluded

RefID: 4642, Farm-Related Concerns and Mental Health Status Among Norwegian Farmers  
B. Logstein  
Level: 2, State: Excluded

RefID: 4702, Predictors of mental complaints among Norwegian male farmers  
B. Logstein  
Level: 2, State: Excluded

RefID: 4729, Farmers' perceptions of health in the Riverland region of South Australia: 'If it's broke, fix it'  
T. A. Rawolle, D. Sadauskas, G. van Kessel, J. Dollman  
Level: 2, State: Excluded

RefID: 4752, Development and validation of a work stressor scale for Australian farming families  
C. J. McShane, F. Quirk, A. Swinbourne  
Level: 2, State: Excluded

RefID: 4784, Pesticide poisoning and neurobehavioral function among farm workers in Jiangsu, People's Republic of China  
X. Zhang, M. Wu, H. Yao, Y. Yang, M. Cui, Z. Tu, L. Stallones, H. Xiang  
Level: 2, State: Excluded

RefID: 4804, Differences in characteristics between suicide cases of farm managers compared to those of farm labourers in Queensland, Australia  
U. Arnautovska, S. McPhedran, D. De Leo  
Level: 2, State: Excluded

RefID: 4808, Mental and Physical Symptoms of Female Rural Workers: Relation between Household and Rural Work  
M. R. Cezar-Vaz, C. A. Bonow, M. R. da Silva  
Level: 2, State: Excluded

RefID: 4951, Work Ability Index (WAI) and its health-related determinants among Iranian farmers working in small farm enterprises  
A. Rostamabadi, A. Mazloumi, A. Rahimi Foroushani  
Level: 2, State: Excluded

RefID: 5011, Occupational exposure to pesticides, nicotine and minor psychiatric disorders among tobacco farmers in southern Brazil

N. M. Faria, A. G. Fassa, R. D. Meucci, N. S. Fiori, V. I. Miranda  
Level: 2, State: Excluded

RefID: 5024, Veterinarian challenges to providing a multi-agency response to farm animal welfare problems in Ireland: responding to the human factor  
C. Devitt, P. Kelly, M. Blake, A. Hanlon, S. J. More  
Level: 2, State: Excluded

RefID: 5208, Empirical evidence suggests adverse climate events have not affected Australian women's health and well-being  
J. R. Powers, D. Loxton, J. Baker, J. L. Rich, A. J. Dobson  
Level: 2, State: Excluded

RefID: 5218, Mental health in Alberta grain farmers using pesticides over many years  
N. Cherry, I. Burstyn, J. Beach, A. Senthilselvan  
Level: 2, State: Excluded

RefID: 5233, Health status and needs of Latino dairy farmworkers in Vermont  
D. Baker, D. Chappelle  
Level: 2, State: Excluded

RefID: 5331, Reducing psychological distress and obesity in Australian farmers by promoting physical activity  
S. Brumby, A. Chandrasekara, S. McCoombe, S. Torres, P. Kremer, P. Lewandowski  
Level: 2, State: Excluded

RefID: 5346, Farming fit? Dispelling the Australian agrarian myth  
S. Brumby, A. Chandrasekara, S. McCoombe, P. Kremer, P. Lewandowski  
Level: 2, State: Excluded

RefID: 5444, Distress among rural residents: does employment and occupation make a difference?  
L. Fragar, H. J. Stain, D. Perkins, B. Kelly, J. Fuller, C. Coleman, T. J. Lewin, J. M. Wilson  
Level: 2, State: Excluded

RefID: 5492, The potential impact on farmer health of enhanced export horticultural trade between the U.K. and Uganda  
P. Cross, R. T. Edwards, P. Nyeko, G. Edwards-Jones  
Level: 2, State: Excluded

RefID: 5499, Challenges of conducting a large rural prospective population-based cohort study: the Keokuk County Rural Health Study  
A. M. Stromquist, J. A. Merchant, C. Zwerling, L. F. Burmeister, W. T. Sanderson, K. M. Kelly  
Level: 2, State: Excluded

RefID: 5514, Chronic back pain and associated work and non-work variables among

farmworkers from Starr County, Texas

E. M. Shipp, S. P. Cooper, D. J. del Junco, G. L. Delclos, K. D. Burau, S. Tortolero, R. E. Whitworth

Level: 2, State: Excluded

RefID: 5577, Mental health status among rural women of reproductive age: findings from the Central Pennsylvania Women's Health Study

M. M. Hillemeier, C. S. Weisman, G. A. Chase, A. M. Dyer

Level: 2, State: Excluded

RefID: 5579, Social networks and mental health among a farming population

H. J. Stain, B. Kelly, T. J. Lewin, N. Higginbotham, J. R. Beard, F. Hourihan

Level: 2, State: Excluded

RefID: 5606, Health and safety needs of older farmers: part I. Work habits and health status

S. K. Lizer, R. E. Petrea

Level: 2, State: Excluded

RefID: 5761, Depressive symptoms in adolescents living in rural America

A. R. Peden, D. B. Reed, M. K. Rayens

Level: 2, State: Excluded

RefID: 5770, Vacations improve mental health among rural women: the Wisconsin Rural Women's Health Study

V. Chikani, D. Reding, P. Gunderson, C. A. McCarty

Level: 2, State: Excluded

RefID: 5802, The impact of depression is unevenly distributed in the population

D. Isacson, K. Bingenfors, L. von Knorring

Level: 2, State: Excluded

RefID: 5819, Gunshot suicides in England--a multicentre study based on coroners' records

L. Sutton, K. Hawton, S. Simkin, P. Turnbull, N. Kapur, O. Bennewith, D. Gunnell

Level: 2, State: Excluded

RefID: 5834, Impact of a foot and mouth disease crisis on post-traumatic stress symptoms in farmers

M. Olf, M. W. Koeter, E. H. Van Haften, P. H. Kersten, B. P. Gersons

Level: 2, State: Excluded

RefID: 5917, Safety practices, neurological symptoms, and pesticide poisoning

C. Beseler, L. Stallones

Level: 2, State: Excluded

RefID: 5968, Pesticide illness, farm practices, and neurological symptoms among farm residents in Colorado



L. Stallones, C. Beseler  
Level: 2, State: Excluded

RefID: 5977, A comparison of cardiovascular disease risk factors in farm and non-farm residents: the Wisconsin Rural Women's Health Study  
C. McCarty, P. H. Chyou, L. Ziegelbauer, D. Kempf, D. McCarty, P. Gunderson, D. Reding  
Level: 2, State: Excluded

RefID: 6036, Pesticide use and pesticide-related symptoms among black farmers in the Agricultural Health Study  
S. A. Martin, D. P. Sandler, S. D. Harlow, D. L. Shore, A. S. Rowland, M. C. Alavanja  
Level: 2, State: Excluded

RefID: 6582, Relationship of hardiness and current life events to perceived health in rural adults  
H. J. Lee  
Level: 2, State: Excluded

RefID: 6630, Family response to the farm crisis: a study in coping  
M. Van Hook  
Level: 2, State: Excluded

RefID: 6686, The farm crisis: an analysis of social psychological distress among North Carolina farm operators  
M. D. Schulman, P. S. Armstrong  
Level: 2, State: Excluded

| Author                                                                                                                                                                | Title                                                                                             |
|-----------------------------------------------------------------------------------------------------------------------------------------------------------------------|---------------------------------------------------------------------------------------------------|
| J. C. Sandberg, H. T. Nguyen, S. A. Quandt, H. Y. Chen, P. Summers, F. O. Walker, A. G. Tribble, P. Summers, H. Y. Chen, S. A. Quandt, T. A. Arcury                   | Sleep Quality Among Latin American Farmworkers with Musculoskeletal pain, depression, and anxiety |
| D. C. Mora, S. A. Quandt, H. Y. Chen, T. A. Arcury                                                                                                                    | Associations of Poor Housing Conditions with Health                                               |
| J. C. Sandberg, J. W. Talton, S. A. Quandt, H. Y. Chen, M. Weir, W. R. Doumani, A. K. O'Connor, M. Stoecklin-Marois, M. B. Schenker                                   | Association Between Housing Conditions and Health: Examining nervous among farmworkers            |
| H. Park, N. L. Sprince, M. Q. Lewis, L. F. Burmeister, P. S. Whitten, C. Zwerling                                                                                     | Risk factors for work-related musculoskeletal disorders                                           |
| B. H. Chaney, E. Torres                                                                                                                                               | Covariates of Identified Stressors                                                                |
| A. K. Ramos, D. J. Su, L. Lander, R. Rivera                                                                                                                           | Stress Factors Contributing to Health Disparities                                                 |
| J. G. Grzywacz, T. Alterman, S. Gabbard, R. Shen, J. Nakamoto, D. J. Carroll, C. M. E. Alderete, W. A. Vega, B. Kolody, S. Aguilar-Gaxiola                            | Job Control, Psychological Distress, and Health: Depressive symptomatology among farmworkers      |
| J. G. Linn, B. A. Husaini                                                                                                                                             | Determinants of Psychological Distress                                                            |
| M. J. Belyea, L. M. Lobao                                                                                                                                             | Psychosocial consequences of farmworker stress                                                    |
| M. K. Rayens, D. B. Reed                                                                                                                                              | Predictors of depressive symptoms among farmworkers                                               |
| C. L. Beseler, L. Stallones                                                                                                                                           | Structural equation modeling of farmworker health                                                 |
| C. L. Beseler, L. Stallones                                                                                                                                           | Safety knowledge, safety behaviors, and health: A cohort study of pesticide applicators           |
| C. L. Beseler, L. Stallones                                                                                                                                           | A cohort study of pesticide applicators: Structural equation modeling of health outcomes          |
| J. A. Merchant, A. M. Stromquist, K. M. Kelly, C. Zwerling, S. J. Reynolds, L. F. Burmeister                                                                          | Chronic disease and injury among farmworkers                                                      |
| H. Xiang, L. Stallones, T. J. Keefe                                                                                                                                   | Back pain and agricultural work: Economic Hardship and Depression                                 |
| C. A. Pulgar, G. Trejo, C. Suerken, E. H. Ip, T. A. Arcury, S. A. Quandt                                                                                              | Economic Hardship and Depression: Correlates of Mental Health                                     |
| Rebecca Crain, Joseph G. Grzywacz, Melody Schwantes, Scott Isom, Sara A. Quandt, Ann E. Hiott, Joseph G. Grzywacz, Stephen W. Davis, Sara A. Quandt, Thomas A. Arcury | Migrant Farmworker Stressors and Health: The prevalence of depression, stress, and irritability   |
| R. D. Scarth, L. Stallones, C. Zwerling, L. F. Burmeister                                                                                                             | The prevalence of depression, stress, and irritability among farmworkers                          |
| Y. S. Kim-Godwin, M. O. Maume, J. A. Fox                                                                                                                              | Depression, Stress, and Irritability among farmworkers                                            |
| H. T. Nguyen, S. A. Quandt, J. G. Grzywacz, H. Y. Chen, L. Galvan, M. H. Kitner-Tric                                                                                  | Stress and cognitive function among farmworkers                                                   |
| J. C. Sandberg, J. G. Grzywacz, J. W. Talton, S. A. Quandt, H. Y. Chen, A. B. Chatterjee                                                                              | A Cross-Sectional Exploration of Farmworker Health                                                |
| J. G. Grzywacz, A. B. Chatterjee, S. A. Quandt, J. W. Talton, H. Y. Chen, M. Weir, T. A. Arcury                                                                       | Depressive Symptoms and Health among Farmworkers                                                  |
| J. G. Grzywacz, S. A. Quandt, H. Y. Chen, S. Isom, L. Kiang, Q. Vallejos, T. A. Arcury                                                                                | Depressive Symptoms and Health among Farmworkers                                                  |
| R. D. Scarth, C. Zwerling, M. Q. Lewis, L. F. Burmeister                                                                                                              | Depression and risk factors among farmworkers                                                     |
| A. K. Ramos, G. Carlo, K. Grant, N. Trinidad, A. Correa                                                                                                               | Stress, Depression, and Occupational Health among farmworkers                                     |
| D. B. Reed, M. K. Rayens, C. K. Conley, S. Westneat, S. M. Adkins                                                                                                     | Farm elders define health and well-being: Exploring the mental health of farmworkers              |
| J. D. Hovey, C. G. Magana                                                                                                                                             | Exploring the mental health of farmworkers                                                        |
| L. Stallones, C. Beseler                                                                                                                                              | Pesticide poisoning and health among farmworkers                                                  |
| M. I. Z. Roblyer, J. G. Grzywacz, C. K. Suerken, G. Trejo, E. H. Ip, T. A. Arcury, S. A. Arcury                                                                       | Interpersonal and social capital among farmworkers                                                |
| K. M. Khan, R. Baidya, A. Aryal, J. R. Farmer, J. Valliant                                                                                                            | Neurological and mental health among farmworkers                                                  |
| M. Schwantes, C. McKinney, N. Hannibal                                                                                                                                | Music therapy's effects on farmworker health                                                      |
| A. M. Bush, S. Westneat, S. R. Browning, J. Swanberg                                                                                                                  | Missed Work Due to Occupational Health among farmworkers                                          |
| J. G. Grzywacz, T. Alterman, C. Muntaner, R. Shen, J. Li, S. Gabbard, J. Nakamoto, T. A. Arcury, G. Trejo, C. K. Suerken, J. G. Grzywacz, E. H. Ip, S. A. Quandt      | Mental Health Research among Farmworkers: Work and Health among Farmworkers                       |
| J. D. Hovey, G. Hurtado, L. D. Seligman                                                                                                                               | Findings for a CBT Support Program among farmworkers                                              |
| S. R. Terrazas, A. McCormick                                                                                                                                          | Coping Strategies That Matter among farmworkers                                                   |

| Journal                              | Country | Study popula | Gender | Sampling        | Study design   |
|--------------------------------------|---------|--------------|--------|-----------------|----------------|
| Journal of Immigrant and Minority    | USA     | Migrant farm | Men    | purposive sam   | Cross-sectiona |
| Archives of Environmental & Occup    | USA     | Migrant farm | Men    | convenience s   | Prospective cc |
| Journal of Agromedicine              | USA     | Migrant farm | Men    | convenience s   | Cross-sectiona |
| Journal of Immigrant and Minority    | USA     | Migrant farm | Men    | convenience s   | Cross-sectiona |
| J Immigr Minor Health                | USA     | Migrant farm | Men    | Stratified ranc | Prospective cc |
| J Occup Environ Med                  | USA     | Farmers      | Men    | Stratified ranc | Prospective cc |
| International Journal of Environme   | USA     | Migrant farm | Mixed  | convenience s   | Cross-sectiona |
| Journal of Immigrant and Minority    | USA     | Migrant farm | Mixed  | convenience s   | Cross-sectiona |
| Journal of Occupational and Enviro   | USA     | Migrant farm | Mixed  | multi-stage sa  | Cross-sectiona |
| Journal of Community Psychology      | USA     | Migrant farm | Mixed  | multi-stage sa  | Cross-sectiona |
| Journal of Community Psychology      | USA     | Farmers      | Mixed  | Simple-randor   | Cross-sectiona |
| Rural sociology                      | USA     | Farmers      | Mixed  | Stratified ranc | Cross-sectiona |
| J Rural Health                       | USA     | Farmers      | Mixed  | convenience s   | Cross-sectiona |
| J Agromedicine                       | USA     | Farmers      | Mixed  | Stratified ranc | Cross-sectiona |
| Am J Ind Med                         | USA     | Farmers      | Mixed  | Stratified ranc | Cohort         |
| Ann Epidemiol                        | USA     | Farmers      | Mixed  | Stratified ranc | Prospective cc |
| J Agromedicine                       | USA     | Farmers      | Mixed  | purposive sam   | Cross-sectiona |
| J Rural Health                       | USA     | Farmers      | Mixed  | Stratified ranc | Cross-sectiona |
| Am J Ind Med                         | USA     | Farmers      | Mixed  | Stratified ranc | Cross-sectiona |
| J Immigr Minor Health                | USA     | Migrant farm | Women  | purposive sam   | Cross-sectiona |
| Journal of rural health              | USA     | Migrant farm | Men    | convenience s   | RCT            |
| Journal of rural health              | USA     | Migrant farm | Men    | convenience s   | Cross-sectiona |
| Am J Ind Med                         | USA     | Farmers      | Men    | Stratified ranc | Cross-sectiona |
| Journal of Immigrant and Minority    | USA     | Migrant farm | Mixed  | convenience s   | Cross-sectiona |
| American Journal of Industrial Med   | USA     | Migrant farm | Mixed  | convenience s   | Prospective cc |
| Journal of Agromedicine              | USA     | Migrant farm | Mixed  | Stratified ranc | Cross-sectiona |
| Journal of Agromedicine              | USA     | Migrant farm | Mixed  | convenience s   | Cross-sectiona |
| Cultural Diversity & Ethnic Minority | USA     | Migrant farm | Mixed  | convenience s   | Cross-sectiona |
| Journal of agromedicine              | USA     | Farmers      | Mixed  | Stratified ranc | Cross-sectiona |
| Safety (Basel)                       | USA     | Migrant farm | Mixed  | convenience s   | Cross-sectiona |
| Workplace Health Saf                 | USA     | Farmers      | Mixed  | convenience s   | Cross-sectiona |
| J Psychol                            | USA     | Migrant farm | Mixed  | Not reported    | Cross-sectiona |
| Ann Epidemiol                        | USA     | Farmers      | Mixed  | multi-stage sa  | Cross-sectiona |
| Women & Health                       | USA     | Migrant farm | Women  | purposive sam   | Cross-sectiona |
| Annals of Agricultural and Environn  | USA     | Farmers      | Men    | Simple-randor   | Cross-sectiona |
| Arts in Psychotherapy                | USA     | Migrant farm | Men    | convenience s   | RCT            |
| Journal of Agricultural Safety and H | USA     | Migrant farm | Mixed  | purposive sam   | Cross-sectiona |
| Journal of immigrant and minority    | USA     | Migrant farm | Mixed  | multi-stage sa  | Cross-sectiona |
| Journal of Occupational and Enviro   | USA     | Migrant farm | Women  | convenience s   | Cross-sectiona |
| Current Psychology                   | USA     | Migrant farm | Women  | purposive sam   | Non-Randomi    |
| Hispanic Journal of Behavioral Scie  | USA     | Migrant farm | Mixed  | convenience s   | Cross-sectiona |
